# Supplementary material
Source: publisher site journal article supplement (https://www.dovepress.com/article/332683)
Supplement: Supplementary file 1 [file get_supplementary_file.php]

**Supplementary materials:** Table S1: List of 90 genes associated with LUAD survival as determined by survival analysis, Table S2: List of 66 prognostic immune genes identified by univariate Cox regression analysis, Table S3: List of seven independent prognostic immune genes identified by multivariate Cox regression analysis, Table S4: KEGG pathways with significant differences in activation status as indicated by gene set variation analysis.

**Table S1: List of 90 genes associated with LUAD survival as determined by survival analysis.**

| names | p | High.median | Low.median |
| --- | --- | --- | --- |
| PRC1 | 6.84E-05 | 39.8 | 57.5 |
| PSMC6 | 8.38E-05 | 42.93333333 | 79.76666667 |
| CDK1 | 0.00010542 | 40.96666667 | 59.26666667 |
| ANLN | 0.000113287 | 42.16666667 | 59.66666667 |
| NUSAP1 | 0.000259695 | 42.93333333 | 54.4 |
| ZEB2 | 0.000346308 | 79.76666667 | 40.5 |
| MKI67 | 0.000580202 | 40.3 | 54.4 |
| ESPL1 | 0.000602934 | 41.93333333 | 55.1 |
| HCG18 | 0.000638998 | 87.33333333 | 39.9 |
| BUB1B | 0.000673241 | 41.93333333 | 55.1 |
| BIRC5 | 0.000771681 | 42.93333333 | 59.26666667 |
| NLRC3 | 0.000909518 | 61 | 40.96666667 |
| CCNB2 | 0.001147397 | 40.5 | 55.1 |
| CFL1 | 0.001164574 | 40.96666667 | 59.93333333 |
| EIF5A | 0.001235744 | 42.16666667 | 57.5 |
| IL6ST | 0.001472044 | 61 | 42.16666667 |
| DAD1 | 0.001549927 | 43.1 | 59.93333333 |
| NBN | 0.001671259 | 45.23333333 | 59.26666667 |
| DIDO1 | 0.002459372 | 59.93333333 | 40.96666667 |
| PTGES3 | 0.002485841 | 43.1 | 59.66666667 |
| XKR6 | 0.002636781 | 72.46666667 | 42.16666667 |
| CD226 | 0.002876939 | 61 | 40.5 |
| PSMD10P1 | 0.003041501 | 59.66666667 | 42.93333333 |
| EXO1 | 0.003405273 | 42.93333333 | 54.4 |
| FKBP3 | 0.003469539 | 42.93333333 | 67.56666667 |
| TPX2 | 0.003892539 | 42.93333333 | 54.4 |
| PSMB5 | 0.003960385 | 42.26666667 | 59.26666667 |
| DOCK9 | 0.004207911 | 59.66666667 | 42.26666667 |
| FANCI | 0.00431333 | 42.93333333 | 54.4 |
| LRRN3 | 0.005490989 | 72.46666667 | 41.93333333 |
| RPS6KA5 | 0.005550649 | 59.66666667 | 41.16666667 |
| RACGAP1 | 0.005921557 | 41.93333333 | 54.4 |
| DNAJC5 | 0.006147031 | 59.93333333 | 42.93333333 |
| YWHAZ | 0.006170198 | 45.23333333 | 54.4 |
| ERCC6L | 0.006405213 | 42.93333333 | 55.1 |
| RORA | 0.006548142 | 61 | 45.23333333 |
| CD160 | 0.006630169 | 61 | 41.16666667 |
| BRCA1 | 0.00748313 | 42.93333333 | 54.4 |
| KLHL20 | 0.00749529 | 59.66666667 | 42.26666667 |
| ITGA4 | 0.007653798 | 61 | 40.96666667 |
| PRKCE | 0.008038825 | 57.5 | 40.96666667 |
| CIITA | 0.008528262 | 59.93333333 | 43.1 |
| BUB1 | 0.009069578 | 43.1 | 54.06666667 |
| HELLS | 0.009552715 | 42.93333333 | 54.06666667 |
| GVINP1 | 0.010166898 | 59.26666667 | 41.16666667 |
| IGF2BP3 | 0.010647076 | 42.93333333 | 55.1 |
| PSMB6 | 0.011163944 | 42.93333333 | 59.66666667 |
| GIMAP5 | 0.011639688 | 59.26666667 | 41.16666667 |
| XRCC2 | 0.012083038 | 43.1 | 53.33333333 |
| CARD8 | 0.012415587 | 67.56666667 | 45.23333333 |
| FANCD2 | 0.01293261 | 45.96666667 | 54.06666667 |
| MIF | 0.013091824 | 42.93333333 | 59.66666667 |
| PLK4 | 0.013624293 | 45.23333333 | 53.33333333 |
| RFX3 | 0.013879927 | 57.5 | 42.26666667 |
| IGF2BP1 | 0.014350363 | 42.93333333 | 54.06666667 |
| ZWILCH | 0.015743025 | 45.23333333 | 54.06666667 |
| MLF2 | 0.016022811 | 42.93333333 | 57.5 |
| G2E3 | 0.016067706 | 43.1 | 54.4 |
| DOCK8 | 0.016495924 | 61 | 41.93333333 |
| DOCK4 | 0.017167205 | 55.1 | 41.16666667 |
| INCENP | 0.017606377 | 42.93333333 | 53.33333333 |
| MASP2 | 0.017800805 | 59.26666667 | 42.93333333 |
| HCFC2 | 0.017801877 | 61 | 40.96666667 |
| MAGI1 | 0.017882994 | 57.5 | 47.36666667 |
| FANCL | 0.018784395 | 45.23333333 | 54.4 |
| CUTA | 0.019193998 | 51.03333333 | 42.93333333 |
| AES | 0.020543268 | 54.06666667 | 48.46666667 |
| SMNDC1 | 0.022120474 | 45.23333333 | 59.26666667 |
| STXBP5 | 0.022829634 | 43.1 | 53.33333333 |
| SNRK | 0.023766647 | 53.33333333 | 45.23333333 |
| TRPM7 | 0.025167408 | 57.5 | 42.93333333 |
| BSG | 0.025604208 | 42.16666667 | 57.5 |
| 2-Mar | 0.02707912 | 51.03333333 | 43.1 |
| KIF1B | 0.02901981 | 57.5 | 45.23333333 |
| SYNJ1 | 0.029704478 | 59.66666667 | 42.26666667 |
| AKAP13 | 0.030293616 | 59.26666667 | 45.96666667 |
| RAPGEF3 | 0.030841151 | 59.26666667 | 45.23333333 |
| TCF3 | 0.031154399 | 61 | 45.96666667 |
| MTFP1 | 0.032028378 | 45.96666667 | 54.06666667 |
| ITPR2 | 0.032040822 | 59.93333333 | 43.1 |
| ABCA5 | 0.032297923 | 55.1 | 42.93333333 |
| ATG5 | 0.03270114 | 48.46666667 | 50.93333333 |
| VEZF1 | 0.03451568 | 57.5 | 40.96666667 |
| IGF2BP2 | 0.037263522 | 45.23333333 | 53.33333333 |
| TOP2A | 0.03941357 | 45.23333333 | 54.06666667 |
| PDCD10 | 0.041110255 | 47.36666667 | 57.5 |
| UBP1 | 0.043223527 | 55.1 | 45.23333333 |
| TRIAP1 | 0.045514745 | 48.46666667 | 57.5 |
| SOCS5 | 0.047496763 | 53.33333333 | 49.73333333 |
| TNFSF12 | 0.049362395 | 57.5 | 43.1 |

Table S2: List of 66 prognostic immune genes identified by univariate Cox regression analysis.

| symbol | HR | lower.95 | upper.95 | p.val |
| --- | --- | --- | --- | --- |
| CFL1 | 3.579409027 | 2.083471211 | 6.149434134 | 3.87E-06 |
| ANLN | 1.497394855 | 1.246945169 | 1.798147511 | 1.54E-05 |
| IGF2BP1 | 1.440090937 | 1.207776067 | 1.717091408 | 4.84E-05 |
| EXO1 | 1.579278568 | 1.261435296 | 1.977208662 | 6.73E-05 |
| PRC1 | 1.629643379 | 1.278665916 | 2.076959673 | 7.93E-05 |
| BIRC5 | 1.441401098 | 1.199802569 | 1.73164917 | 9.38E-05 |
| TPX2 | 1.409716253 | 1.18160831 | 1.681860136 | 0.000137325 |
| EIF5A | 1.898844904 | 1.359892625 | 2.651394604 | 0.000166727 |
| CCNB2 | 1.411562869 | 1.167129279 | 1.707188542 | 0.000380938 |
| MLF2 | 1.863964359 | 1.310399787 | 2.651376448 | 0.000532997 |
| CDK1 | 1.379627631 | 1.136379399 | 1.674944478 | 0.0011467 |
| MKI67 | 1.401716818 | 1.142478939 | 1.719777905 | 0.001209643 |
| MIF | 1.522354421 | 1.178428256 | 1.966655986 | 0.001297282 |
| RFX3 | 0.403704107 | 0.231727815 | 0.703312226 | 0.001361868 |
| LRRN3 | 0.356323001 | 0.188477705 | 0.673639789 | 0.001494336 |
| HCFC2 | 0.445646063 | 0.269065073 | 0.738112944 | 0.001692376 |
| RORA | 0.463120026 | 0.28551404 | 0.751207044 | 0.001813709 |
| FANCI | 1.54261582 | 1.172689614 | 2.029235647 | 0.001943624 |
| YWHAZ | 1.818770357 | 1.243457283 | 2.660264777 | 0.002048957 |
| MAGI1 | 0.519425262 | 0.342489898 | 0.787768063 | 0.002052071 |
| PTGES3 | 1.656764603 | 1.199271773 | 2.288779751 | 0.002197985 |
| DIDO1 | 0.502391955 | 0.320824554 | 0.786715582 | 0.002626971 |
| DOCK4 | 0.562754238 | 0.386290853 | 0.819828712 | 0.002746091 |
| BUB1B | 1.406991684 | 1.124626875 | 1.760251016 | 0.002811475 |
| SYNJ1 | 0.477989962 | 0.293884064 | 0.777430395 | 0.002935293 |
| PSMB5 | 1.64166545 | 1.180588618 | 2.282815037 | 0.003210121 |
| NUSAP1 | 1.382311712 | 1.112481517 | 1.717588686 | 0.003477969 |
| CIITA | 0.698073623 | 0.54736599 | 0.890275961 | 0.003772398 |
| UBP1 | 0.432255576 | 0.242988781 | 0.768944482 | 0.004317541 |
| SOCS5 | 0.491892079 | 0.301570297 | 0.802326421 | 0.00447969 |
| IGF2BP3 | 1.305271104 | 1.085015735 | 1.570237739 | 0.004724109 |
| KIF1B | 0.529308253 | 0.33876762 | 0.827018905 | 0.005203976 |
| RACGAP1 | 1.403017984 | 1.10459529 | 1.782063967 | 0.005515758 |
| IL6ST | 0.691242322 | 0.530744427 | 0.900275017 | 0.006157318 |
| ITGA4 | 0.669305501 | 0.502095141 | 0.892201133 | 0.006187066 |
| PRKCE | 0.502632882 | 0.306566434 | 0.824094835 | 0.00639321 |
| ESPL1 | 1.439470792 | 1.106020577 | 1.873451729 | 0.006738884 |
| DOCK9 | 0.673380034 | 0.50449046 | 0.898809207 | 0.007272868 |
| TOP2A | 1.252140422 | 1.060218125 | 1.478804785 | 0.008077831 |
| INCENP | 1.50212701 | 1.108387437 | 2.035737215 | 0.008703693 |
| BUB1 | 1.342307508 | 1.075823546 | 1.674800157 | 0.009127265 |
| ZEB2 | 0.644459992 | 0.462651502 | 0.897713893 | 0.009375376 |
| IGF2BP2 | 1.27198081 | 1.055260215 | 1.533209685 | 0.011591103 |
| PSMB6 | 1.620159161 | 1.112381205 | 2.359726768 | 0.011899962 |
| TRPM7 | 0.520096739 | 0.311608926 | 0.868077245 | 0.012375393 |
| AKAP13 | 0.700245842 | 0.529148414 | 0.926666746 | 0.012674955 |
| ERCC6L | 1.549947536 | 1.096369815 | 2.191174301 | 0.01310841 |
| PSMD10P1 | 0.34565116 | 0.148421572 | 0.804968729 | 0.013779603 |
| ITPR2 | 0.711642699 | 0.541820171 | 0.93469265 | 0.014466073 |
| BRCA1 | 1.462782395 | 1.076077354 | 1.988455872 | 0.015180479 |
| GVINP1 | 0.599668342 | 0.395847592 | 0.908435791 | 0.015816587 |
| BSG | 1.493908529 | 1.077524992 | 2.071193438 | 0.01604587 |
| MTFP1 | 1.530976314 | 1.07533069 | 2.179690858 | 0.018132489 |
| CD226 | 0.400956497 | 0.185764513 | 0.865429621 | 0.019904164 |
| MASP2 | 0.334960455 | 0.128334507 | 0.874266076 | 0.025451623 |
| FANCD2 | 1.594257361 | 1.056437896 | 2.405874063 | 0.026319743 |
| RPS6KA5 | 0.30461474 | 0.106029278 | 0.875136954 | 0.027267434 |
| TRIAP1 | 1.546091141 | 1.046376989 | 2.284451819 | 0.028701701 |
| CD160 | 0.193747419 | 0.044025798 | 0.852637858 | 0.029943962 |
| RAPGEF3 | 0.601981331 | 0.374022348 | 0.968876658 | 0.03660185 |
| PLK4 | 1.367614641 | 1.016225059 | 1.840507464 | 0.038810854 |
| XRCC2 | 1.380296363 | 1.015560092 | 1.8760269 | 0.039534092 |
| ABCA5 | 0.633668189 | 0.407228494 | 0.986019836 | 0.043137892 |
| CARD8 | 0.612942644 | 0.380090691 | 0.988444849 | 0.044682225 |
| ZWILCH | 1.478243025 | 1.00730394 | 2.169357583 | 0.045808965 |
| DOCK8 | 0.755531583 | 0.572651739 | 0.996815226 | 0.047420772 |

Table S3: List of seven independent prognostic immune genes identified by multivariate Cox regression analysis.

|  | HR | lower.95 | upper.95 | p.value | β |
| --- | --- | --- | --- | --- | --- |
| PSMD10P1 | 0.136348602 | 0.031027096 | 0.599184053 | 0.008337437 | -1.992540421 |
| PRC1 | 7.223980098 | 1.646046274 | 31.70377971 | 0.008782758 | 1.977406061 |
| CIITA | 0.407813182 | 0.196112093 | 0.848043532 | 0.016340865 | -0.896946096 |
| ABCA5 | 3.638189166 | 1.186300327 | 11.1577314 | 0.023898622 | 1.291486076 |
| ANLN | 1.898306785 | 1.039936373 | 3.465181856 | 0.036843 | 0.640962323 |
| DIDO1 | 0.275621414 | 0.080684138 | 0.941537779 | 0.039775386 | -1.288727044 |
| ZWILCH | 0.228232781 | 0.053810167 | 0.968036438 | 0.045066894 | -1.477389203 |

Table S4: KEGG pathways with significant differences in activation status as indicated by gene set variation analysis.

|  | logFC | AveExpr | t | P.Value | adj.P.Val | B |
| --- | --- | --- | --- | --- | --- | --- |
| KEGG_INSULIN_SIGNALING_PATHWAY | 0.020431162 | 0.319624291 | 5.241748095 | 2.34E-07 | 3.49E-05 | 6.0025718 |
| KEGG_PROSTATE_CANCER | 0.02457087 | 0.342074387 | 5.148929046 | 3.75E-07 | 3.49E-05 | 5.545729826 |
| KEGG_LYSOSOME | 0.028487806 | 0.348746368 | 4.640817211 | 4.42E-06 | 0.000207466 | 3.176292785 |
| KEGG_ENDOMETRIAL_CANCER | 0.027006704 | 0.367540943 | 4.638886966 | 4.46E-06 | 0.000207466 | 3.16772028 |
| KEGG_LYSINE_DEGRADATION | 0.026922508 | 0.378293209 | 4.453182224 | 1.04E-05 | 0.000387252 | 2.358344241 |
| KEGG_COLORECTAL_CANCER | 0.022194476 | 0.355730104 | 4.372446232 | 1.49E-05 | 0.000462193 | 2.015995977 |
| KEGG_CHRONIC_MYELOID_LEUKEMIA | 0.022927204 | 0.353357728 | 4.31355696 | 1.93E-05 | 0.000502429 | 1.769949282 |
| KEGG_SPHINGOLIPID_METABOLISM | 0.027137536 | 0.395075833 | 4.28768801 | 2.16E-05 | 0.000502429 | 1.662845402 |
| KEGG_GLIOMA | 0.021864871 | 0.347582259 | 4.199843778 | 3.15E-05 | 0.000651882 | 1.303625181 |
| KEGG_NOTCH_SIGNALING_PATHWAY | 0.025034466 | 0.368813556 | 4.059546379 | 5.69E-05 | 0.000977295 | 0.744313868 |
| KEGG_SNARE_INTERACTIONS_IN_VESICULAR_TRANSPORT | 0.022914061 | 0.376397161 | 4.055856745 | 5.78E-05 | 0.000977295 | 0.729844723 |
| KEGG_UBIQUITIN_MEDIATED_PROTEOLYSIS | 0.020889294 | 0.335282854 | 3.987740727 | 7.65E-05 | 0.001185662 | 0.464940204 |
| KEGG_GLYCEROLIPID_METABOLISM | 0.022739739 | 0.362888531 | 3.967117482 | 8.32E-05 | 0.001190448 | 0.385566743 |
| KEGG_WNT_SIGNALING_PATHWAY | 0.016482171 | 0.317111623 | 3.925918712 | 9.83E-05 | 0.001306131 | 0.228161991 |
| KEGG_GLYCOSPHINGOLIPID_BIOSYNTHESIS_GANGLIO_SERIES | 0.032531437 | 0.46130673 | 3.823815275 | 0.00014772 | 0.001831723 | -0.155264156 |
| KEGG_PEROXISOME | 0.021929833 | 0.362425742 | 3.800319808 | 0.000162023 | 0.001883515 | -0.242146937 |
| KEGG_N_GLYCAN_BIOSYNTHESIS | 0.023853675 | 0.381212139 | 3.779663004 | 0.000175668 | 0.001922017 | -0.318114896 |
| KEGG_MTOR_SIGNALING_PATHWAY | 0.019708998 | 0.359097397 | 3.741036071 | 0.00020414 | 0.002109451 | -0.459119772 |
| KEGG_PATHWAYS_IN_CANCER | 0.013461264 | 0.301940921 | 3.71082546 | 0.000229382 | 0.002245527 | -0.568446224 |
| KEGG_ADIPOCYTOKINE_SIGNALING_PATHWAY | 0.018153818 | 0.347351315 | 3.664963659 | 0.000273376 | 0.0025424 | -0.732806146 |
| KEGG_GLYCOSAMINOGLYCAN_DEGRADATION | 0.028594292 | 0.443181564 | 3.599277033 | 0.000350364 | 0.003023508 | -0.964836271 |
| KEGG_GLYCINE_SERINE_AND_THREONINE_METABOLISM | 0.022757789 | 0.395054456 | 3.59380655 | 0.000357619 | 0.003023508 | -0.983980329 |
| KEGG_ENDOCYTOSIS | 0.013942134 | 0.316926421 | 3.55423062 | 0.000414454 | 0.003351673 | -1.121652444 |
| KEGG_INOSITOL_PHOSPHATE_METABOLISM | 0.019983424 | 0.354164841 | 3.510026056 | 0.000487892 | 0.003781161 | -1.273710972 |
| KEGG_REGULATION_OF_AUTOPHAGY | 0.025432576 | 0.422139736 | 3.431475807 | 0.000649219 | 0.004830189 | -1.539439067 |
| KEGG_ACUTE_MYELOID_LEUKEMIA | 0.019511101 | 0.35902963 | 3.412385638 | 0.000695329 | 0.004974277 | -1.603152463 |
| KEGG_ADHERENS_JUNCTION | 0.020366225 | 0.362852177 | 3.383591029 | 0.000770685 | 0.005158882 | -1.698612089 |
| KEGG_FATTY_ACID_METABOLISM | 0.025125216 | 0.38815647 | 3.381441002 | 0.000776606 | 0.005158882 | -1.705708823 |
| KEGG_NEUROACTIVE_LIGAND_RECEPTOR_INTERACTION | -0.019195835 | 0.285531235 | -3.328828756 | 0.000935393 | 0.005999419 | -1.878024957 |
| KEGG_NON_SMALL_CELL_LUNG_CANCER | 0.017724728 | 0.356195032 | 3.287564043 | 0.001080506 | 0.006581095 | -2.011365457 |
| KEGG_PANCREATIC_CANCER | 0.017228032 | 0.355751051 | 3.2808265 | 0.001106094 | 0.006581095 | -2.032985461 |
| KEGG_MAPK_SIGNALING_PATHWAY | 0.011175252 | 0.297404369 | 3.268594969 | 0.00115399 | 0.006581095 | -2.072126397 |
| KEGG_APOPTOSIS | 0.017217175 | 0.346868538 | 3.265201676 | 0.001167614 | 0.006581095 | -2.082960113 |
| KEGG_AMYOTROPHIC_LATERAL_SCLEROSIS_ALS | 0.016633215 | 0.350124703 | 3.206678817 | 0.001427319 | 0.007808275 | -2.268106393 |
| KEGG_PHOSPHATIDYLINOSITOL_SIGNALING_SYSTEM | 0.018036673 | 0.335914956 | 3.18723325 | 0.001524806 | 0.008103253 | -2.328913976 |
| KEGG_BASAL_CELL_CARCINOMA | 0.018255172 | 0.353785195 | 3.128649309 | 0.00185691 | 0.009594036 | -2.509960865 |
| KEGG_HEDGEHOG_SIGNALING_PATHWAY | 0.016834948 | 0.347874266 | 3.031845272 | 0.002554686 | 0.012842475 | -2.802035815 |
| KEGG_MELANOMA | 0.015859086 | 0.345416509 | 2.797732344 | 0.005341541 | 0.026145438 | -3.47172712 |
| KEGG_MELANOGENESIS | 0.011534577 | 0.318981496 | 2.751406482 | 0.006145849 | 0.029310972 | -3.598068579 |
| KEGG_ERBB_SIGNALING_PATHWAY | 0.012624289 | 0.328663 | 2.716041241 | 0.006831806 | 0.031767897 | -3.693139662 |
| KEGG_AMINO_SUGAR_AND_NUCLEOTIDE_SUGAR_METABOLISM | 0.016575509 | 0.39418412 | 2.665887379 | 0.007923012 | 0.035382627 | -3.825917445 |
| KEGG_BASAL_TRANSCRIPTION_FACTORS | 0.020817849 | 0.408417554 | 2.663031238 | 0.007989626 | 0.035382627 | -3.833406422 |
| KEGG_CIRCADIAN_RHYTHM_MAMMAL | 0.022615766 | 0.470401246 | 2.645129719 | 0.008418716 | 0.036415839 | -3.88016748 |
| KEGG_NUCLEOTIDE_EXCISION_REPAIR | 0.018895261 | 0.392645403 | 2.570679758 | 0.010433431 | 0.043342611 | -4.071346901 |
| KEGG_RENAL_CELL_CARCINOMA | 0.01478449 | 0.357509181 | 2.568911548 | 0.010486116 | 0.043342611 | -4.075822855 |
| KEGG_PRIMARY_IMMUNODEFICIENCY | -0.03066398 | 0.447145413 | -2.52075506 | 0.012015292 | 0.048583571 | -4.196569482 |
| KEGG_GLYCEROPHOSPHOLIPID_METABOLISM | 0.010534281 | 0.334867462 | 2.505758686 | 0.012530405 | 0.049588413 | -4.233716143 |
